# Supplementary material for: Effects of cyano (CN)-groups on the planarity, film morphology and photovoltaic performance of benzodithiophene-based polymers
Source: Royal Society of Chemistry journal article supplement (doi:10.1039/c4py00357h), 2014-01-01
Supplement: c4py00357h1.pdf [file c4py00357h1.pdf]

## Electronic Supplementary Information

### Effect of Cyano (CN)-group on the Properties of Benzodithiophene-Based Polymers in Planarity, Photovoltaic Performance and Film Morphologies

Jialing Lu,<sup>a</sup> Jianyu Yuan,<sup>a</sup> Wenping Guo,<sup>b</sup> Xiaodong Huang,<sup>a</sup> Zeke Liu,<sup>a</sup> Haibing Zhao,<sup>b</sup> Hai-Qiao Wang,<sup>a\*</sup> Wanli Ma<sup>a\*</sup>

<sup>a</sup> Institute of Functional Nano & Soft Materials (FUNSOM), Soochow University 199 Ren-Ai Road, Suzhou Industrial Park, Suzhou, Jiangsu 215123, P. R. China

<sup>b</sup> Shanghai Ultra-precision Optical Engineering Center, and Key laboratory of Micro and Nano Photonic Structures (Ministry of Education), Department of Optical Science and Engineering, Fudan University, Shanghai 200433, China.

\* Corresponding author. Tel.: +0086 051265880927

E-mail addresses: [hqwang@suda.edu.cn](mailto:hqwang@suda.edu.cn) (H.-Q. Wang), [wlma@suda.edu.cn](mailto:wlma@suda.edu.cn) (W. L. Ma)

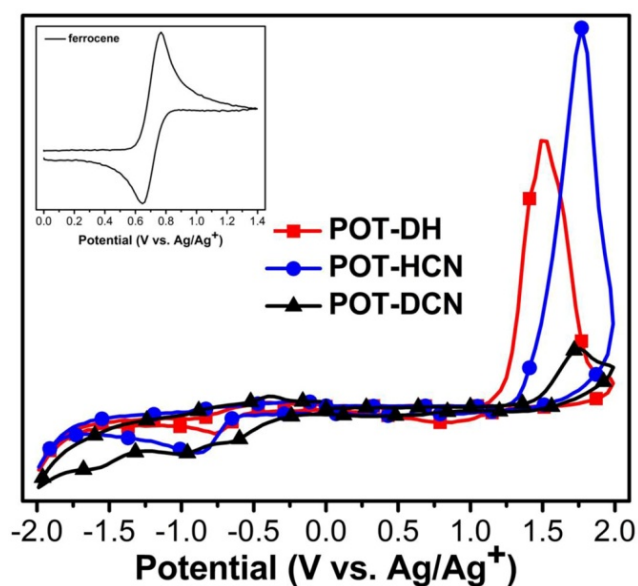

**Fig. S1** Cyclic voltammograms of polymer films on a platinum electrode in acetonitrile solution containing 0.1 M Bu<sub>4</sub>NPF<sub>6</sub> at a scan rate of 50 mV/s.

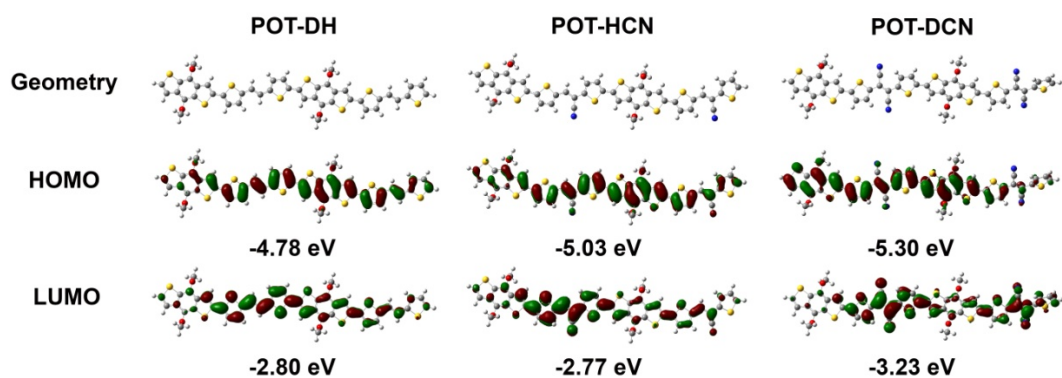

**Fig. S2** Optimized geometries, molecular orbital surfaces and calculated HOMO/LUMO energy levels of the model compounds, obtained at the DFT/B3LYP/6-31GD level.

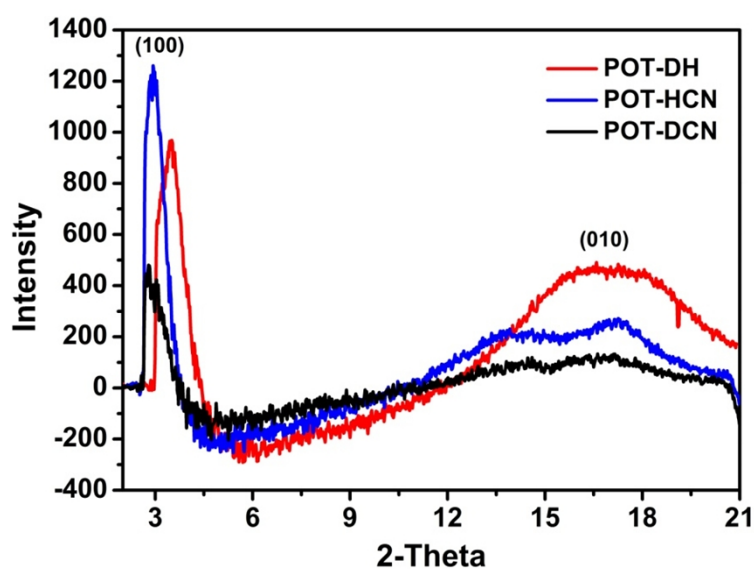

**Fig. S3** 1D-graph of GIXD of polymers.

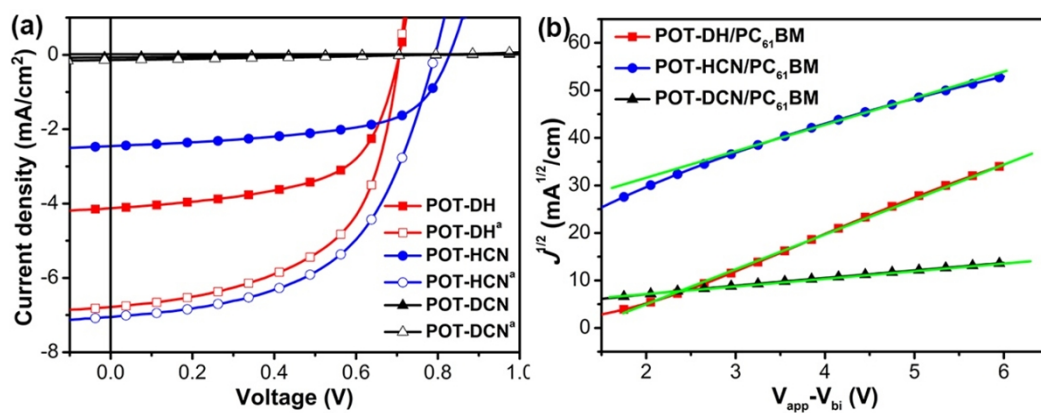

**Fig. S4** (a) Current density–voltage ( $I$ – $V$ ) curves of the PSCs based on polymer/ $\text{PC}_{61}\text{BM}$  (1:1.5, w/w) with ( $\bullet$ , empty symbol) and without DIO (full symbol); (b)  $J^{1/2}$ – $V$  characteristics of the hole-only devices based on polymer/ $\text{PC}_{61}\text{BM}$  measured at ambient temperature.

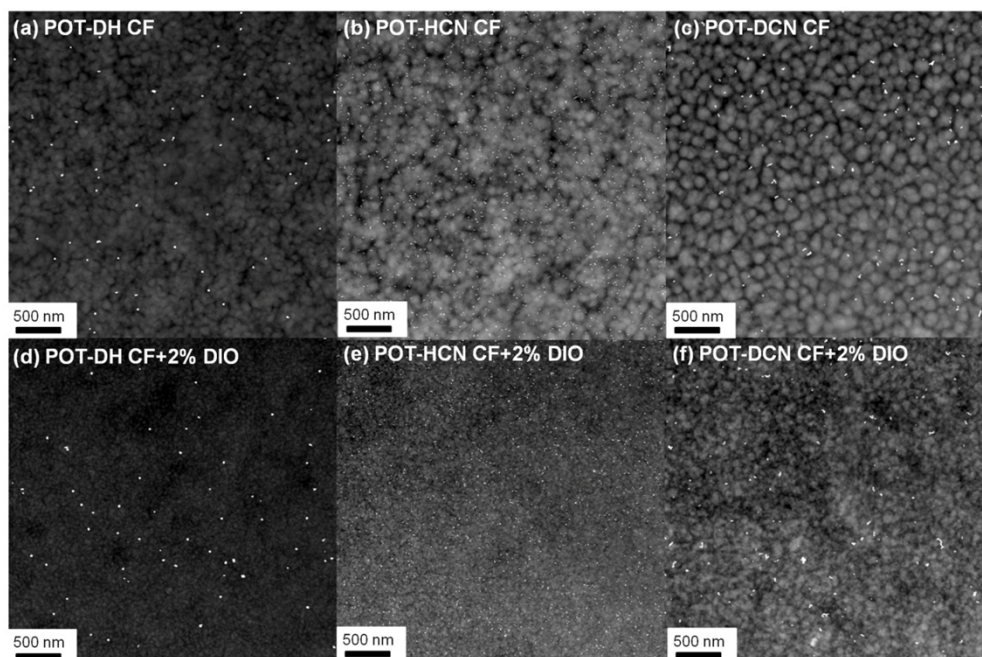

**Fig. S5** HAADF-STEM images of polymer/PC<sub>61</sub>BM blends (1:1.5 w/w) cast from chloroform or chloroform with 2% DIO.

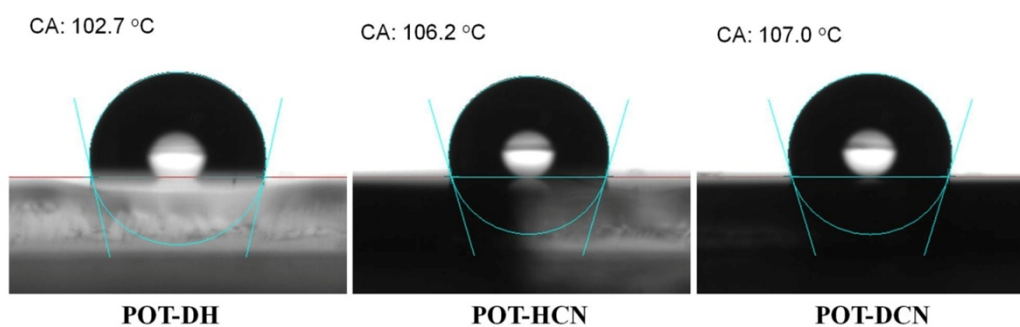

**Fig. S6** Contact angles of three polymers by dropping water on the polymer films cast from CHCl<sub>3</sub> solutions.

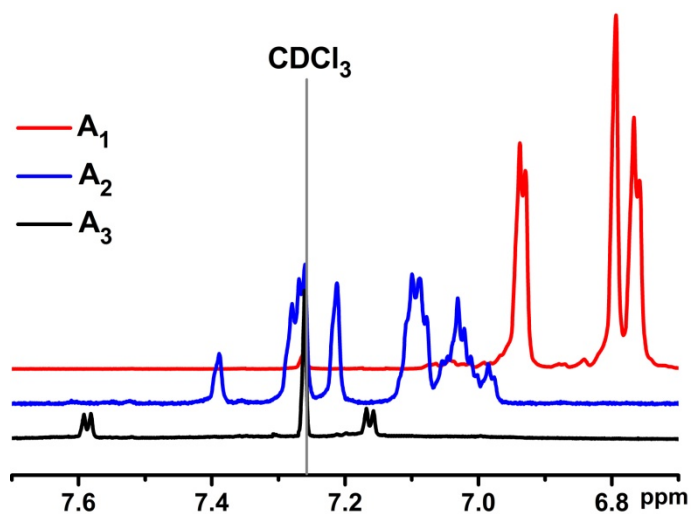

**Fig. S7** <sup>1</sup>H NMR spectrum of monomer A<sub>1</sub>, A<sub>2</sub> and A<sub>3</sub>.

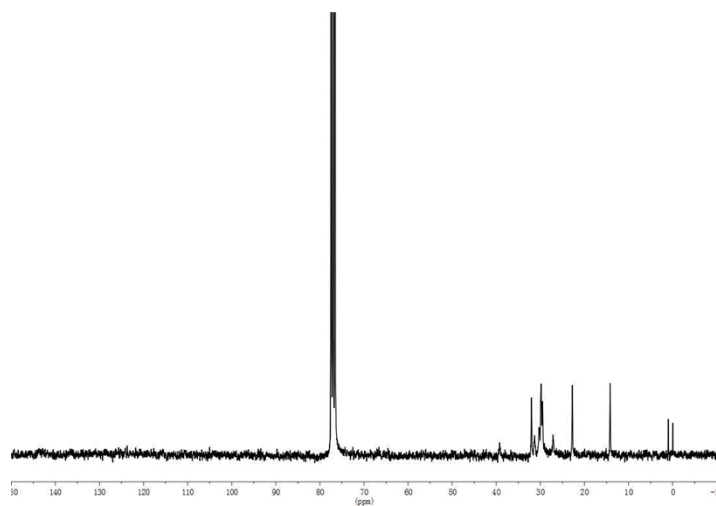

**Fig. S8**  $^{13}\text{C}$  NMR spectrum of **POT-DH**.

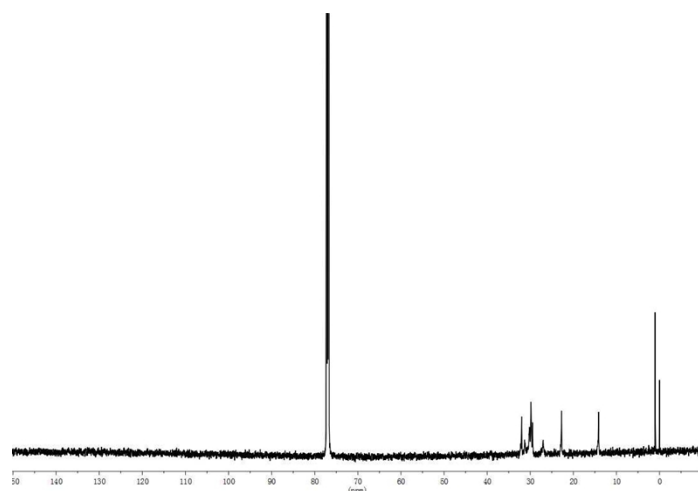

**Fig. S9**  $^{13}\text{C}$  NMR spectrum of **POT-HCN**.

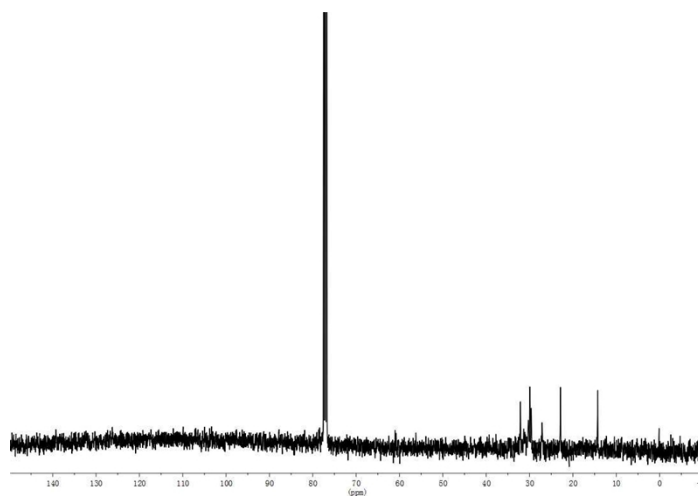

**Fig. S10**  $^{13}\text{C}$  NMR spectrum of **POT-DCN**.

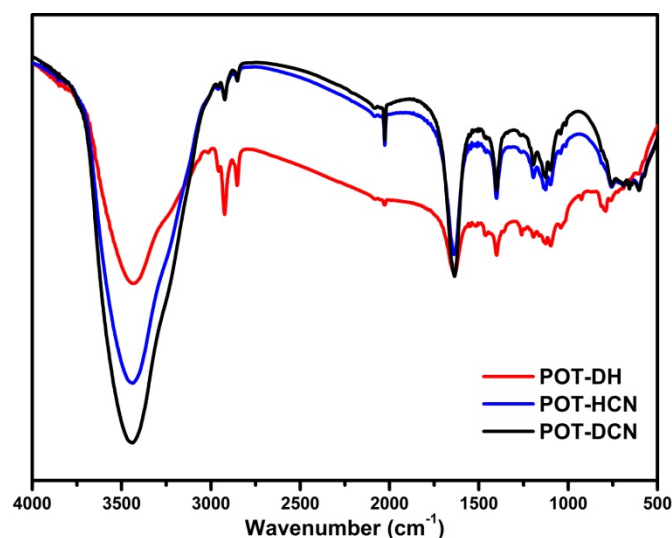

**Fig. S11** Infrared spectra of three polymers. The spectra were recorded using KBr pellets.

**Table S1.** Optimization of donor/acceptor ratio and solvent for polymer/PC<sub>61</sub>BM solar cells.

| Polymer | D/A   | Solvent      | Speed<br>(r) | $V_{oc}$<br>(V) | $J_{sc}$<br>(mA/cm <sup>2</sup> ) | FF<br>(%) | PCE<br>(%)  |
|---------|-------|--------------|--------------|-----------------|-----------------------------------|-----------|-------------|
| POT-DH  | 1:3   | CF           | 1500         | 0.69            | 4.52                              | 66.2      | 2.06        |
|         | 1:3   | CF+2% DIO    | 1500         | 0.70            | 6.82                              | 56.1      | 2.68        |
|         | 1:2   | CF           | 1500         | 0.73            | 3.35                              | 68.1      | 1.67        |
|         | 1:2   | CF+2% DIO    | 1500         | 0.69            | 6.43                              | 56.5      | 2.51        |
|         | 1:1.5 | CF           | 1500         | 0.70            | 4.12                              | 60.5      | 1.74        |
|         | 1:1.5 | CF+2% DIO    | 1500         | 0.70            | 6.77                              | 57.5      | <b>2.72</b> |
|         | 1:1   | CF           | 1500         | 0.70            | 3.85                              | 61.5      | 1.66        |
|         | 1:1   | CF+2% DIO    | 1500         | 0.69            | 6.14                              | 57.3      | 2.42        |
|         | 1:3   | CB           | 800          | 0.70            | 1.89                              | 34.9      | 0.46        |
|         | 1:3   | CB +2% DIO   | 800          | 0.70            | 3.85                              | 65.9      | 1.78        |
|         | 1:2   | CB           | 800          | 0.69            | 1.04                              | 37.5      | 0.27        |
|         | 1:2   | CB +2% DIO   | 800          | 0.73            | 4.45                              | 64.3      | 2.09        |
|         | 1:1.5 | CB           | 800          | 0.65            | 1.09                              | 38.4      | 0.27        |
|         | 1:1.5 | CB +2% DIO   | 800          | 0.74            | 4.60                              | 64.9      | <b>2.21</b> |
|         | 1:1   | CB           | 800          | 0.68            | 0.83                              | 34.0      | 0.19        |
|         | 1:1   | CB +2% DIO   | 800          | 0.75            | 4.16                              | 67.6      | 2.11        |
|         | 1:3   | ODCB         | 800          | 0.70            | 2.94                              | 67.0      | 1.38        |
|         | 1:3   | ODCB +2% DIO | 800          | 0.71            | 3.44                              | 68.7      | 1.68        |
|         | 1:2   | ODCB         | 800          | 0.74            | 3.17                              | 68.2      | 1.60        |
|         | 1:2   | ODCB +2% DIO | 800          | 0.74            | 3.72                              | 68.8      | 1.89        |
|         | 1:1.5 | ODCB         | 800          | 0.74            | 3.40                              | 69.0      | 1.74        |
|         | 1:1.5 | ODCB +2% DIO | 800          | 0.71            | 3.84                              | 70.0      | <b>1.91</b> |
|         | 1:1   | ODCB         | 800          | 0.74            | 3.20                              | 67.6      | 1.60        |
|         | 1:1   | ODCB +2% DIO | 800          | 0.70            | 3.84                              | 64.3      | 1.73        |

|                |                |              |           |      |      |      |             |             |
|----------------|----------------|--------------|-----------|------|------|------|-------------|-------------|
| <b>POT-HCN</b> | 1:3            | CF           | 1500      | 0.79 | 2.34 | 61.0 | 1.13        |             |
|                | 1:3            | CF+2% DIO    | 1500      | 0.76 | 7.04 | 47.3 | 2.53        |             |
|                | 1:2            | CF           | 1500      | 0.80 | 2.13 | 61.3 | 1.04        |             |
|                | 1:2            | CF+2% DIO    | 1500      | 0.76 | 6.27 | 50.8 | 2.42        |             |
|                | 1:1.5          | CF           | 1500      | 0.83 | 2.45 | 59.6 | 1.21        |             |
|                | 1:1.5          | CF+1% DIO    | 1500      | 0.75 | 5.71 | 51.3 | 2.20        |             |
|                | 1:1.5          | CF+2% DIO    | 1000      | 0.76 | 5.57 | 50.9 | 2.15        |             |
|                | 1:1.5          | CF+2% DIO    | 1200      | 0.78 | 5.29 | 51.4 | 2.12        |             |
|                | 1:1.5          | CF+2% DIO    | 1400      | 0.78 | 5.93 | 48.6 | 2.25        |             |
|                | 1:1.5          | CF+2% DIO    | 1500      | 0.79 | 7.05 | 54.4 | <b>3.03</b> |             |
|                | 1:1.5          | CF+3% DIO    | 1500      | 0.76 | 5.97 | 51.5 | 2.34        |             |
|                | 1:1            | CF           | 1500      | 0.75 | 1.23 | 55.4 | 0.51        |             |
|                | 1:1            | CF+2% DIO    | 1500      | 0.78 | 6.32 | 49.9 | 2.46        |             |
|                | 1:3            | CB           | 800       | 0.65 | 1.69 | 44.8 | 0.49        |             |
|                | 1:3            | CB+2% DIO    | 800       | 0.73 | 4.67 | 55.6 | 1.90        |             |
|                | 1:2            | CB           | 800       | 0.64 | 1.61 | 50.0 | 0.52        |             |
|                | 1:2            | CB+2% DIO    | 800       | 0.70 | 5.39 | 54.8 | 2.07        |             |
|                | 1:1.5          | CB           | 800       | 0.65 | 1.51 | 49.4 | 0.48        |             |
|                | 1:1.5          | CB+2% DIO    | 800       | 0.74 | 5.15 | 59.8 | <b>2.28</b> |             |
|                | 1:1            | CB           | 800       | 0.69 | 1.29 | 47.0 | 0.42        |             |
|                | 1:1            | CB+2% DIO    | 800       | 0.75 | 4.68 | 58.2 | 2.04        |             |
|                | 1:3            | ODCB         | 800       | 0.74 | 2.33 | 52.2 | 0.90        |             |
|                | 1:3            | ODCB+2% DIO  | 800       | 0.74 | 2.55 | 55.0 | 1.04        |             |
|                | 1:2            | ODCB         | 800       | 0.74 | 3.92 | 58.2 | 1.69        |             |
|                | 1:2            | ODCB+2% DIO  | 800       | 0.76 | 3.50 | 58.1 | 1.55        |             |
|                | 1:1.5          | ODCB         | 800       | 0.79 | 3.82 | 58.2 | 1.76        |             |
|                | 1:1.5          | ODCB+2% DIO  | 800       | 0.75 | 3.95 | 57.7 | 1.71        |             |
|                | 1:1            | ODCB         | 800       | 0.75 | 3.88 | 61.7 | 1.80        |             |
|                | 1:1            | ODCB+2% DIO  | 800       | 0.78 | 4.20 | 59.5 | <b>1.95</b> |             |
|                | <b>POT-DCN</b> | 1:1.5        | CF        | 1500 | 0.80 | 0.07 | 24.0        | 0.01        |
|                |                | 1:1.5        | CF+2% DIO | 1500 | 0.77 | 0.14 | 28.8        | <b>0.03</b> |
|                |                | 1:1.5        | CB        | 800  | 0.75 | 0.09 | 25.0        | 0.02        |
| 1:1.5          |                | CB+2% DIO    | 800       | 0.72 | 0.15 | 27.5 | 0.03        |             |
| 1:1.5          |                | ODCB         | 800       | 0.78 | 0.10 | 28.9 | 0.02        |             |
| 1:1.5          |                | ODCB +2% DIO | 800       | 0.74 | 0.13 | 30.1 | 0.03        |             |
